# Supplementary material
Source: Elsevier journal article supplement (https://www.sciencedirect.com/science/article/pii/S0375090620300501)
Supplement: mmc1 [file S0375090620300501:mmc1.docx]

**Anexo 1**.

*A) Datos de demográficos:*

1.- País donde trabaja: .

2.- Hospital donde trabaja: .

3.- Edad: .

4.- Sexo:

Femenino . Masculino .

5.- Actividad en el hospital:

1. Residente de gastroenterología .
2. Residente de endoscopia .
3. Residente de hepatología o motilidad .
4. Adscrito de gastroenterología .
5. Adscrito de endoscopia .

6.- Años de práctica en gastroenterología: .

7.- Ha realizado algún procedimiento endoscópico en el último mes.

Si . No .

*B)* *Conocimiento general sobre la infección por SARS-CoV-2:*

8.- Cuáles son los síntomas más frecuentes en infección por SARS-CoV-2? (selecciona 3 respuestas)

Fiebre . Congestión nasal .

Tos . Conjuntivitis .

Expectoración . Náusea o vómito .

Dolor faríngeo . Diarrea .

Cefalea . No sé .

9.- De las siguientes características ¿Cuáles confieren mayor riesgo de presentar enfermedad grave por SARS-CoV-2?

Obesidad . Tabaquismo .

EPOC . Hipertensión arterial sistémica .

Diabetes . Edad mayor a 65 años .

No sé .

10.- Cuáles son las rutas de transmisión conocidas para infección por SARS-CoV-2 (puede elegir más de una)

Gotas . Contacto .

Parenteral . Vía aérea .

Vectores . No sé .

11.- ¿En que muestras biológicas se ha encontrado el SARS-CoV-2?

Sangre . Heces .

Secreción respiratoria . Todas las anteriores .

No sé .

*Conocimiento sobre la infección SARS-CoV-2 y procedimientos endoscópicos.*

12.- ¿Existe riesgo de transmisión de SARS-CoV-2 en procedimientos endoscópicos?

Si . No . No sé .

13.- ¿Qué equipo personal se necesita para realizar cualquier procedimiento endoscópico durante la contingencia sanitaria? (cualquier endoscopia, no necesariamente pacientes con infección por SARS-CoV-2).

Lentes protectores . Bata estéril .

Bata no estéril . Guantes .

Cubrebocas convencional . Cubrebocas n-95 .

14.- ¿Qué precauciones de prevención y control se deben tomar en procedimientos endoscópicos durante la contingencia sanitaria? (puede seleccionar más de uno)

Estándar . Contacto .

Gotas . No sé .

15.- ¿Cuáles son los procedimientos de desinfección posterior a una endoscopia en todo paciente con sospecha o enfermedad por SARS-CoV-2?

1. Reprocesamiento según lo estándares habituales .
2. No reutilizar el material usado en paciente con infección por SARS-CoV-2 .
3. Dejar los materiales el doble de tiempo en el proceso de desinfección .
4. No sé .

16.- ¿Se deberían posponer los procedimientos endoscópicos electivos durante la contingencia por SARS-CoV-2?

Si . No . No sé .
